# Supplementary material
Source: PubMed Central journal article supplement (PMC8162307)
Supplement: NIHMS1694732-supplement-Supplementary_Information.pdf [file NIHMS1694732-supplement-Supplementary_Information.pdf]

# Supplementary Figures

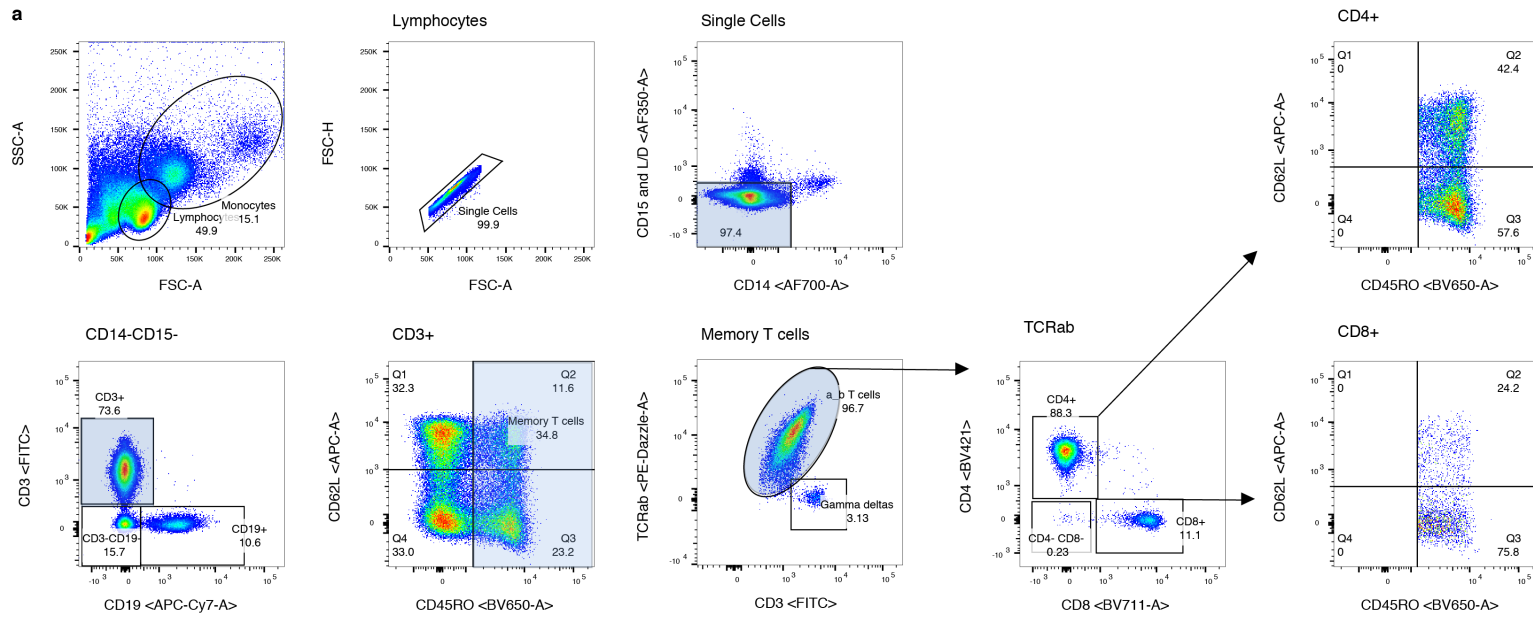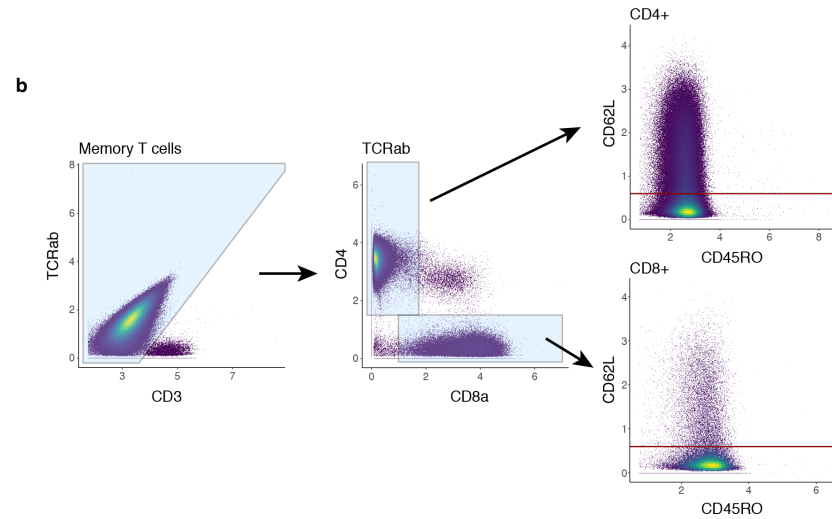

**Supplementary Fig. 1. Representative gating of memory T cell subpopulations.** **a**, Cells gated on flow cytometry protein expression. **b**, Cells passing QC gated on CITE-seq protein expression. Biaxial plots show cells passing QC plotted on centered-log-ratio-normalized protein measurements.

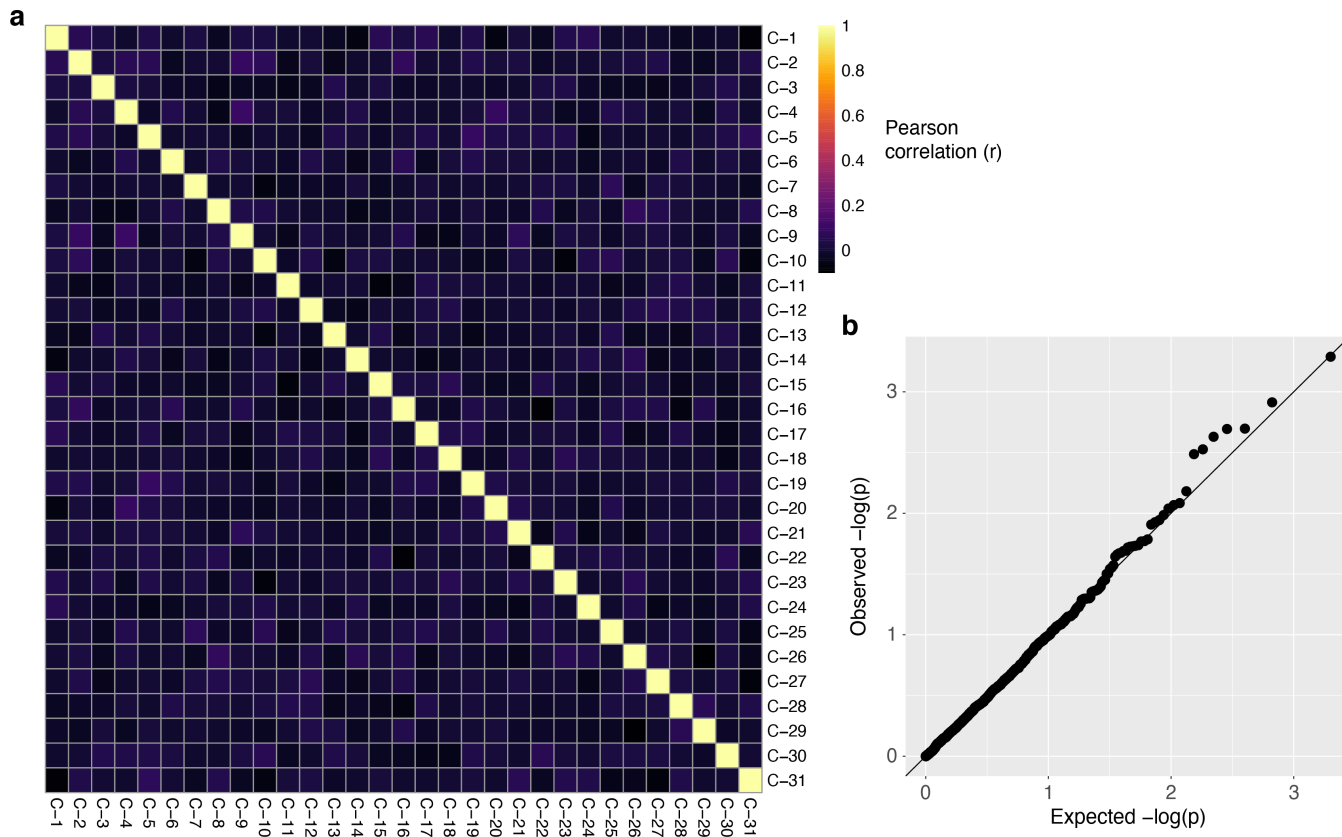

**Supplementary Fig. 2. Gamma distribution of aggregated MASC p-values under the null.** **a**, Heatmap showing Pearson correlations ( $r$ ) of  $-\ln(\text{MASC LRT } p \text{ value})$  between pairs of clusters under the null hypothesis. MASC LRT  $p$  values were obtained from 1,000 iterations of MASC to associate cluster membership with TB progression status permuted across donors. Average  $r$  between clusters'  $-\ln(p \text{ values})=0.003$ . **b**, Quantile-quantile plot comparing observed gamma  $p$  values under the null hypothesis with expected quantiles. Gamma  $p$  values were computed from the simulated  $p$  values described in **(a)**.

**a**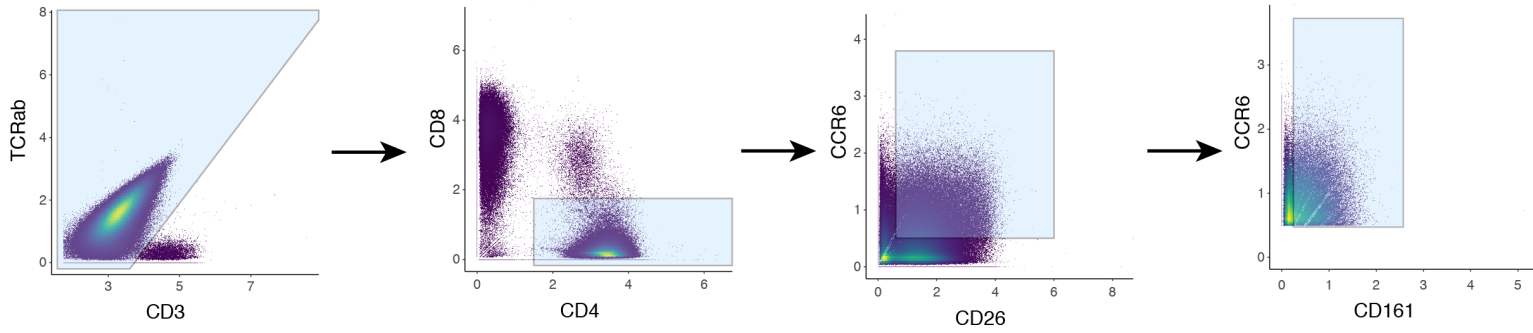**b**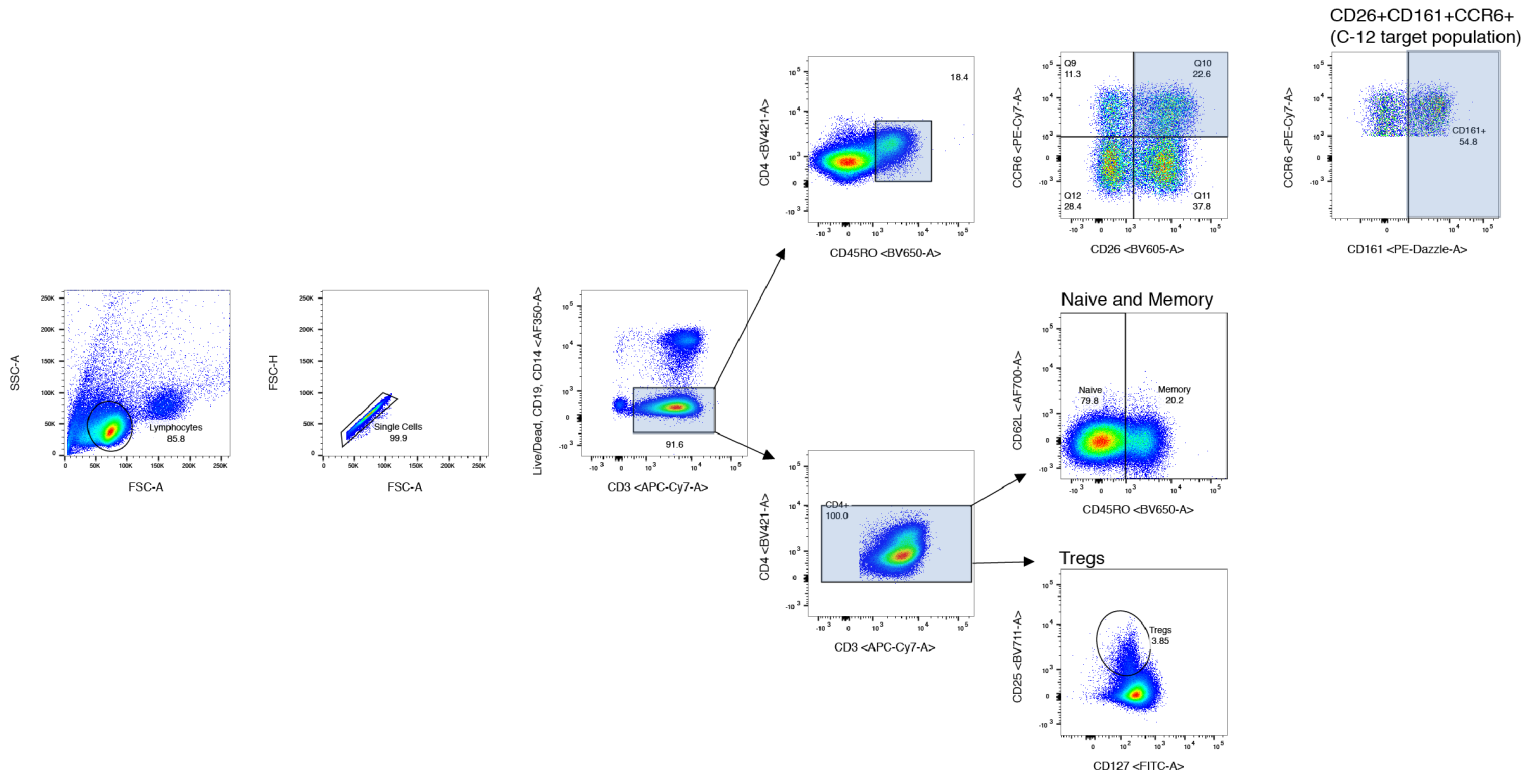

**Supplementary Fig. 3. Representative gating of C-12.** **a**, Biaxial plots showing gating of TCR $\alpha\beta$ +CD4+CD8-CD26+CD161+CCR6+ cells in CITE-seq data. **b**, Biaxial plots showing gating of target (CD3+CD4+CD26+CD161+CCR6+) and control populations from a Boston donor.
